# Supplementary material for: Using multi-scale distribution and movement effects along a montane highway to identify optimal crossing locations for a large-bodied mammal community
Source: PeerJ. 2013 Oct 24;1:e189. doi: 10.7717/peerj.189 (PMC3817594; doi:10.7717/peerj.189)
Supplement: Table S2 [file peerj-01-189-s009.xlsx]

## Sheet: EOSD
Table S2: Individual species/group covariate averages from the best EOSD models used for.
mapping. Based on Table 4 in main text. Results presented here correspond to cells with asterixes.
	Highway				Transect
Scale	comb	comb	comb	comb	comb	1km	comb	500m
Distribution	ZIP	ZINB	ZINB	ZIP	NB	ZINB	ZINB	Poiss
COUNT	Carnivora	Deer	Elk	Moose	Carnivora	Deer	Elk	Moose
Intercept	-1.77	1.057	1.15	0.79	-0.968	1.156	-1.242	-2.092
woodZ	-	-	-	-	-	-	-	-
shrubZ	-	-	-	-	-	-	-	-
herbZ	-	-	-	-	-	-	-	-
riparianZ	-	-	-	-	-	-	-	-
freshwZ	-	-	-	-	-	-	-	-
no_vegZ	-	-	-	-	-	-	-	-
hwyZ	-	-	-	-	-	-	-	-
road_pathZ	-	-	-	-	-	-	-	-
railroadZ	-	-	-	-	-	-	-	-
residZ	-	-	-	-	-	-	-	-
disturbedZ	-	-	-	-	-	-	-	-
wetlandZ	-	0	-	-	-	-	-	-
Wat_200Z	0	0	0	0	0.277	-	0.342	-
Expos_200Z	0	0	0	0	0	-	0	-
ShrL_200Z	0	0	0	0	0	-	0	-
Wetl_200Z	0	0	0	0	0	-	0.277	-
Herb_200Z	0	0	0	0	-0.441	-	0	-
Con3_200Z	0	0	0	0	0	-	0	-
Con2_200Z	0	0	0	0	0	-	0	-
Brdl2_200Z	0	0	0	0	0.014	-	0	-
rdl_up_200Z	0	0	0	0	0.115	-	0	-
rdl_p_200Z	-1.025	0	0	0.599	0	-	0	-
build_200Z	-0.679	0	0	0	0	-	0.649	-
Wat_500Z	0.777	0	0	2.556	0	-	0	0
Expos_500Z	0	0	0	-0.284	0	-	1.514	-0.401
ShrL_500Z	0	0	0	0	-0.204	-	0	-0.578
Wetl_500Z	0	0	0	0	0	-	0	-0.494
Herb_500Z	0	0	0	0	0.225	-	1.062	0.327
Con3_500Z	0	0	0	0	0	-	0.813	0.225
Con2_500Z	0	0	0	0	0	-	0	-0.513
Brdl2_500Z	0	0	0	0	0	-	0.205	0.325
rdl_up_500Z	0	0	0	0	0.05	-	0.794	0.642
rdl_p_500Z	2.075	0	0	0	0.023	-	0	-0.394
build_500Z	0	-0.087	0	0	0	-	-0.962	0
Wat_1KZ	0	0	0	0	-0.325	0	0	-
Expos_1KZ	0	0	-0.164	0	0	-2.353	0	-
ShrL_1KZ	0	0	0	0	-0.024	-0.753	0	-
Wetl_1KZ	0	0	0	0	0	-0.644	-0.979	-
Herb_1KZ	0	-0.146	0.089	0	-0.036	-0.916	-0.77	-
Con3_1KZ	0	0	0	0	-0.617	-0.977	0	-
Con2_1KZ	0	0	0	0	0.601	-2.303	0	-
Brdl2_1KZ	0	0	-0.167	-1.055	0	-0.174	0.107	-
rdl_up_1KZ	0	0	0	0.774	0	0	0.592	-
rdl_p_1KZ	0	0	0	0.516	-0.04	0	0	-
build_1KZ	-2.03	0	0	0	0	0	0	-
theta	-	2.657	3.336	-	1.361	2.036	3.136	-
Table S2 cont.
	Highway				Transect
Scale	comb	comb	comb	comb	comb	1km	comb	500m
Distribution	ZIP	ZINB	ZINB	ZIP	NB	ZINB	ZINB	Poiss
Zero Inflated	Carnivora	Deer	Elk	Moose	Carnivora	Deer	Elk	Moose
Intercept	-3.559	-1.001	0.482	4.599	-	-3.014	-0.484	-
woodZ	-	-	-	-	-	-	-	-
shrubZ	-	-	-	-	-	-	-	-
herbZ	-	-	-	-	-	-	-	-
riparianZ	-	-	-	-	-	-	-	-
freshwZ	-	-	-	-	-	-	-	-
no_vegZ	-	-	-	-	-	-	-	-
hwyZ	-	-	-	-	-	-	-	-
road_pathZ	-	-	-	-	-	-	-	-
railroadZ	-	-	-	-	-	-	-	-
residZ	-	-	-	-	-	-	-	-
disturbedZ	-	-	-	-	-	-	-	-
wetlandZ	-	-	-	-	-	-	-	-
Wat_200Z	0	0	0	0	-	-	0	-
Expos_200Z	0	0	0	0	-	-	0	-
ShrL_200Z	0	0	0	0	-	-	0	-
Wetl_200Z	0	0	0	0	-	-	0	-
Herb_200Z	0	0	0	0	-	-	0	-
Con3_200Z	0	0	0	0	-	-	0	-
Con2_200Z	0	0	0	0	-	-	0	-
Brdl2_200Z	0	0	0	0	-	-	0	-
rdl_up_200Z	0	0	0	0	-	-	0	-
rdl_p_200Z	-4.366	0	0	1.344	-	-	0	-
build_200Z	-2.535	0	0	0	-	-	0	-
Wat_500Z	1.975	0	0	9.002	-	-	0	-
Expos_500Z	0	0	0	-0.657	-	-	0	-
ShrL_500Z	0	0	0	0	-	-	0	-
Wetl_500Z	0	0	0	0	-	-	0	-
Herb_500Z	0	0	0	0	-	-	0	-
Con3_500Z	0	0	0	0	-	-	0	-
Con2_500Z	0	0	0	0	-	-	0	-
Brdl2_500Z	0	0	0	0	-	-	0	-
rdl_up_500Z	0	0	0	0	-	-	0	-
rdl_p_500Z	7.806	0	0	0	-	-	0	-
build_500Z	0	-0.633	0	0	-	-	0	-
Wat_1KZ	0	0	0	0	-	0	0	-
Expos_1KZ	0	0	-0.295	0	-	22.071	0	-
ShrL_1KZ	0	0	0	0	-	5.438	0	-
Wetl_1KZ	0	0	0	0	-	6.371	0	-
Herb_1KZ	0	0.777	-0.625	0	-	7.389	0	-
Con3_1KZ	0	0	0	0	-	8.367	0	-
Con2_1KZ	0	0	0	0	-	21.489	0	-
Brdl2_1KZ	0	0	0.24	-4.858	-	2.247	0	-
rdl_up_1KZ	0	0	0	1.957	-	0	0	-
rdl_p_1KZ	0	0	0	2.018	-	0	0	-
build_1KZ	-6.069	0	0	0	-	0	0	-
